# Supplementary material for: Ultra-small Fe3O4 nanodots encapsulated in layered carbon nanosheets with fast kinetics for lithium/potassium-ion battery anodes
Source: Royal Society of Chemistry journal article supplement (doi:10.1039/d0ra08503k), 2021-01-01
Supplement: d0ra08503k1.pdf [file d0ra08503k1.pdf]

## Electronic Supplementary Information

### Ultra-small $\text{Fe}_3\text{O}_4$ nanodots encapsulated in layered carbon nanosheets with fast kinetics for lithium/potassium-ion battery anodes

Qianqian Peng,<sup>a†</sup> Chuan Guo,<sup>a†</sup> Shuo Qi,<sup>a</sup> Weiwei Sun,<sup>a</sup> Li-Ping Lv,<sup>a</sup> Fei-Hu Du,<sup>a</sup> Baofeng Wang,<sup>b</sup> Shuangqiang Chen,<sup>a\*</sup> Yong Wang<sup>a\*</sup>

<sup>a</sup> Department of Chemical Engineering, School of Environmental and Chemical Engineering, Shanghai University, 99 Shangda Road, Shanghai, P. R. China, 200444. Email: chensq@shu.edu.cn; yongwang@shu.edu.cn; Tel: +86-21-66136598

<sup>b</sup> Shanghai Key Laboratory of Materials Protection and Advanced Materials in Electric Power, Shanghai University of Electric Power, Shanghai 200090, China.

(<sup>†</sup> The authors contributed to this work equally)

#### Figures and Tables

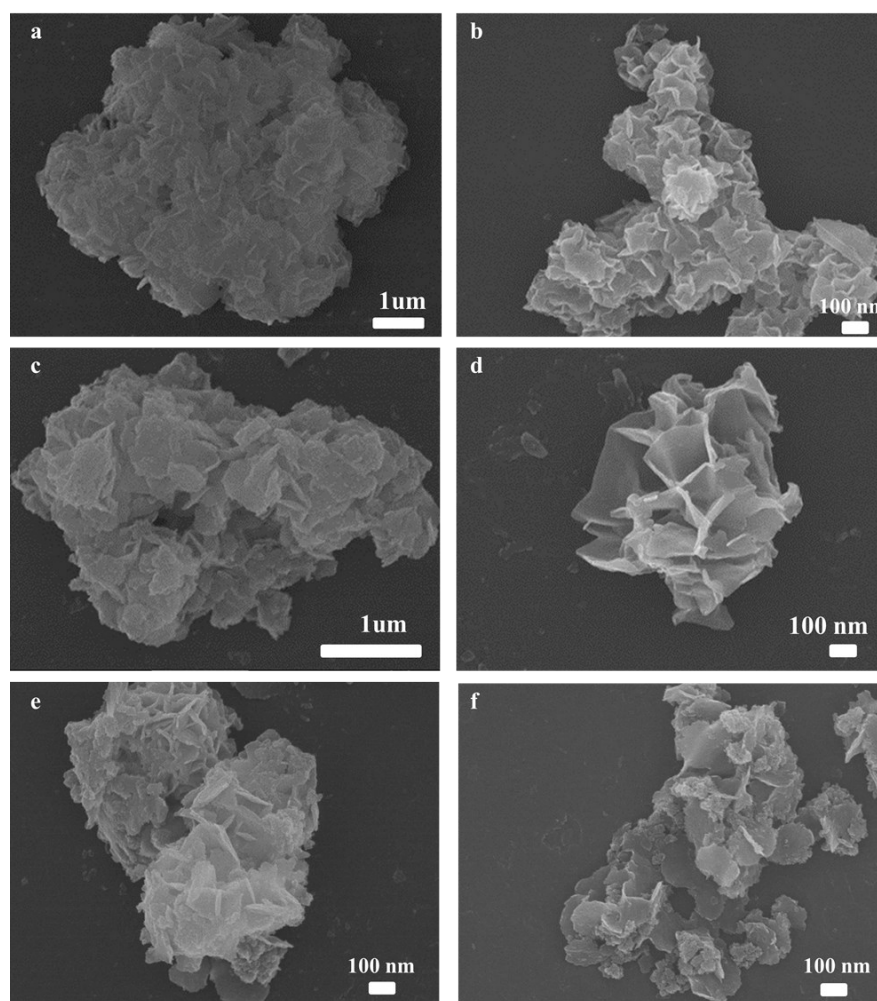

**Fig. S1** SEM images of (a and b) Fe-coordination compound; (c and d)  $\text{Fe}_3\text{O}_4$ @LCS-400; (e and f)  $\text{Fe}_3\text{O}_4$ @LCS-600

**Table S1** Elemental analysis of Fe<sub>3</sub>O<sub>4</sub>@LCS-(400/500/600) nanocomposites

| Samples                                 | Elemental contents (wt. %) |       |      |       |
|-----------------------------------------|----------------------------|-------|------|-------|
|                                         | O                          | C     | H    | Fe    |
| Fe <sub>3</sub> O <sub>4</sub> @LCS-400 | 21.31                      | 21.74 | 1.13 | 55.82 |
| Fe <sub>3</sub> O <sub>4</sub> @LCS-500 | 21.54                      | 20.83 | 1.24 | 55.99 |
| Fe <sub>3</sub> O <sub>4</sub> @LCS-600 | 22.25                      | 19.04 | 0.45 | 58.26 |

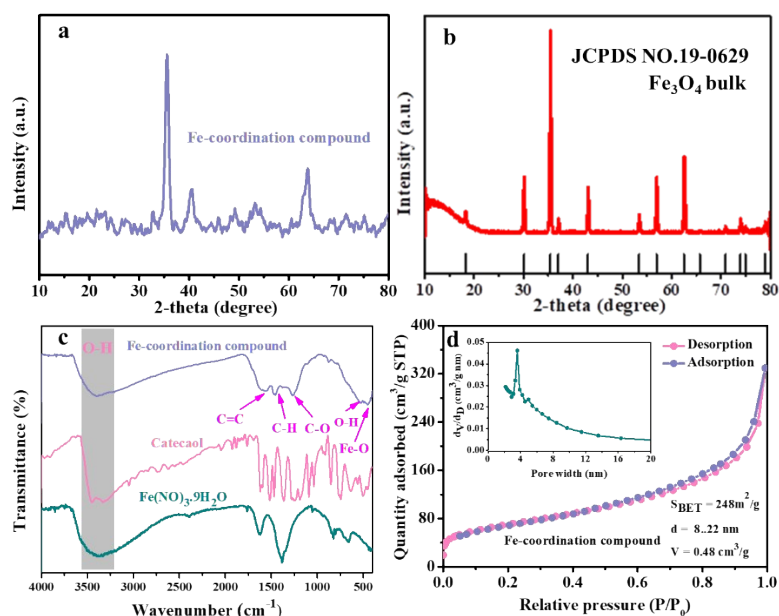

**Fig. S2** XRD patterns of (a) Fe-coordination compound and (b) Fe<sub>3</sub>O<sub>4</sub> bulk, (c) FTIR curves of Fe-coordination compound, catechol and Fe(NO<sub>3</sub>)<sub>3</sub>·9H<sub>2</sub>O, (d) Nitrogen adsorption-desorption isotherms and plots for the pore-size distribution of Fe-coordination compound.

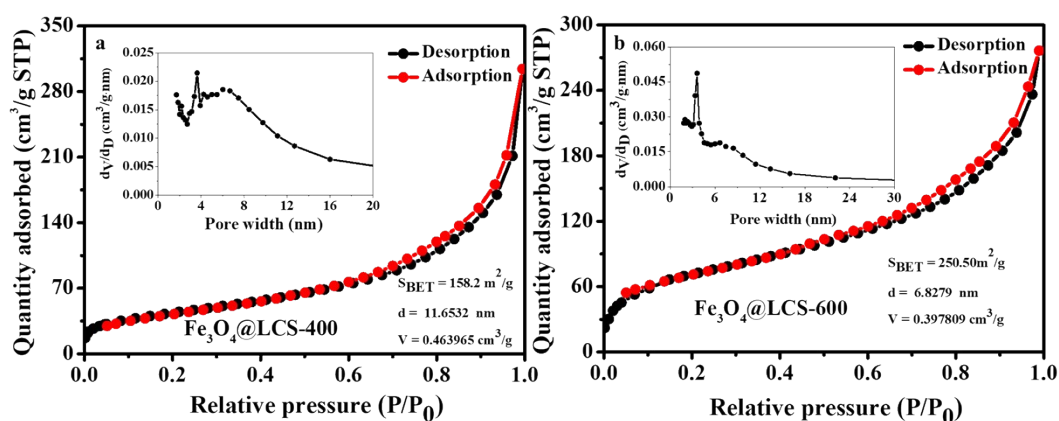

**Fig. S3** Nitrogen adsorption isotherm and the corresponding average pore size distribution of (a) Fe<sub>3</sub>O<sub>4</sub>@LCS-400; (b) Fe<sub>3</sub>O<sub>4</sub>@LCS-600

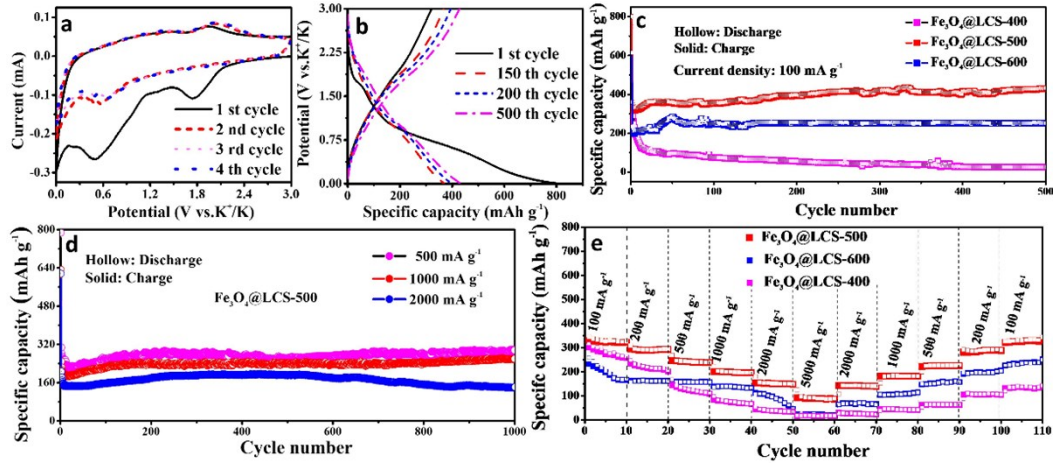

**Fig. S4.** The electrochemical performances of Fe<sub>3</sub>O<sub>4</sub>@LCS-500 electrode as the anode of KIBs: (a) CV curves in the first four cycles at 0.1 mV s<sup>-1</sup>. (b) charge/discharge profiles at 100 mA g<sup>-1</sup>. (c) Cycling performance of Fe<sub>3</sub>O<sub>4</sub>@LCS-400/500/600 at 100 mA g<sup>-1</sup>. (d) Cycling performances of Fe<sub>3</sub>O<sub>4</sub>@LCS-500 at current densities of 500, 1000, and 2000 mA g<sup>-1</sup>, respectively. (e) The rate performances of Fe<sub>3</sub>O<sub>4</sub>@LCS-(400/500/600) electrodes at various current densities.

To examine the possibility of application in KIBs, Fe<sub>3</sub>O<sub>4</sub>@LCS-500 nanocomposites were measured *via* similar electrochemical techniques as LIBs. Cycle voltammetry was applied to analyze the potentials of K<sup>+</sup> ion's insertion/extraction properties in Fig. S4a. Fig. S4b presents charge/discharge behaviors of the Fe<sub>3</sub>O<sub>4</sub>@LCS-500 electrode at 100 mA g<sup>-1</sup>, exhibiting a rechargeable capacity of 321.2 mAh g<sup>-1</sup> with a Coulombic efficiency of 40%, and a discharge plateau at ~0.55 V in the first cycle. The largely irreversible capacity loss is ascribed to the formation of the SEI layer, irreversible carbon storage, and the decomposition of the electrolyte. Cycling performances of Fe<sub>3</sub>O<sub>4</sub>@LCS-(400/500/600) electrodes are shown in Fig. S4c. Fe<sub>3</sub>O<sub>4</sub>@LCS-500 electrode maintained a reversible capacity of 429.7 mAh g<sup>-1</sup> after 500 cycles. By contrast, the reversible capacities of Fe<sub>3</sub>O<sub>4</sub>@LCS-400 and Fe<sub>3</sub>O<sub>4</sub>@LCS-600 were only 24.5 and 250.5 mAh g<sup>-1</sup> after 500 cycles, respectively. And the Fe<sub>3</sub>O<sub>4</sub> bulk electrode delivered a reversible capacity of 36.9 mAh g<sup>-1</sup> as shown in Fig. S9a. Specifically, Fe<sub>3</sub>O<sub>4</sub>@LCS-500 electrode has exhibited good rate capacities of 286.8, 260, and 141.1 mAh g<sup>-1</sup> at current densities of 500, 1000, and 2000 mA g<sup>-1</sup>, respectively. To demonstrate the rate capability, Fe<sub>3</sub>O<sub>4</sub>@LCS-(400/500/600) electrodes were further tested at different current densities of 100, 200, 500, 1000, and 2000 mA g<sup>-1</sup> in Fig. S4e. With the advantages of ultra-small Fe<sub>3</sub>O<sub>4</sub> nanodots, high surface area, thin and mesoporous carbon

layers,  $\text{Fe}_3\text{O}_4@\text{LCS-500}$  electrode has delivered high reversible capacities of 340, 330, 294, 246, and 201  $\text{mAh g}^{-1}$ , respectively. When the current density was returned to  $100 \text{ mA g}^{-1}$ , the capacity of  $\text{Fe}_3\text{O}_4@\text{LCS-500}$  electrode reached  $321 \text{ mAh g}^{-1}$ , close to the initial reversible capacity, which is highly ascribed to the short potassium pathway among  $\text{Fe}_3\text{O}_4$  nanodots, high surface area, and fast potassium diffusion coefficient. In contrast,  $\text{Fe}_3\text{O}_4@\text{LCS-(400/600)}$  electrodes and the  $\text{Fe}_3\text{O}_4$  bulk electrode (Fig. S9b) exhibited slightly poor rate capabilities, which were probably ascribed to high internal resistance and low electronic conductivity.

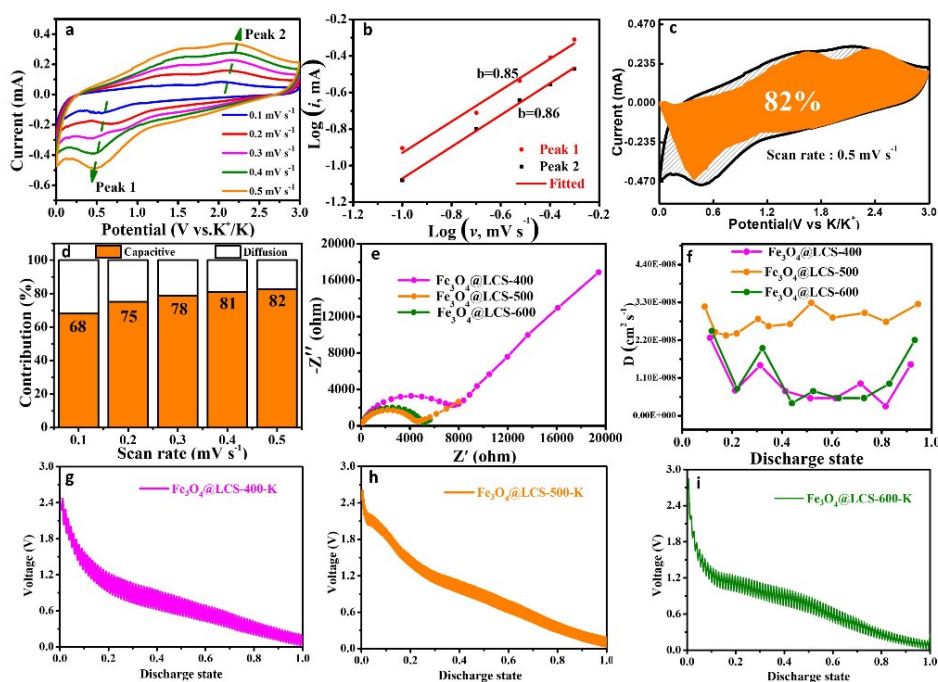

**Fig. S5.** Capacity contribution and potassium diffusion coefficients of  $\text{Fe}_3\text{O}_4@\text{LCS-500}$  for KIB's anode : (a) CV curves at different scan rates from 0.1 to  $0.5 \text{ mV s}^{-1}$ ; (b) b value with linear relationship between  $\log(i)$  and  $\log(v)$ ; (c) capacitive contributions at  $0.5 \text{ mV s}^{-1}$ ; (d) contribution ratio of capacitive-controlled behaviors at various scan rates; (e) the Nyquist plots and (f) chemical diffusion coefficients of  $\text{K}^+$  ions in different electrodes and (g-i) GITT curves of  $\text{Fe}_3\text{O}_4@\text{LCS-(400/500/600)}$  electrodes.

To quantify the potassium diffusion coefficient and capacitive controlled behavior, CV curves at various scan rates, ranging from  $0.1$  to  $0.5 \text{ mV s}^{-1}$ , were investigated. The CV curves show similar shapes in Fig. S5a, but exhibit increased intensities of anodic and cathodic peaks as scan rates are increasing. Similar investigations about capacity contribution between capacitive and diffusion-

controlled behaviors are adopted as that of LIBs. Based on the CV curves and the above-mentioned equations, the b values, the slopes of the fitted plots in Fig. S5b, were calculated to be 0.85 and 0.86, respectively, illustrating dominated capacitive controlled behavior. Regarding to the two-type b value for LIBs and one-type for KIBs, the Li cations can adequately react with Fe<sub>3</sub>O<sub>4</sub> and reversibly during cycles, but K cations can only fully react with Fe<sub>3</sub>O<sub>4</sub> in the first discharge process, leaving a high irreversible capacity loss, which can be demonstrated by their initial Coulombic efficiencies of 65.76% for LIBs and 40% for KIBs. Therefore, LIBs are mainly dominated by diffusive behaviors during discharge and capacitive behavior during charge, yet KIBs are only displaying the capacitive behavior during charge and discharge, namely K cations are only reacted with Fe<sub>3</sub>O<sub>4</sub> on the surface after the first discharge process. In Fig. S5c, the portion of capacitive contribution at 0.5 mV s<sup>-1</sup> of Fe<sub>3</sub>O<sub>4</sub>@LCS-500 electrode was 82%. The contribution ratio is also different if the applied current density is changed. As shown in Fig. S5d, about 68% of the total capacity comes from surface capacitance at a low scan rate of 0.1 mV s<sup>-1</sup>. This value is gradually increased to 75%, 78%, 81% and 82% as the scan rate is increased to 0.2, 0.3, 0.4 and 0.5 mV s<sup>-1</sup>, respectively. Note that the capacitive-controlled and diffusion-controlled contributions have coexisted at both low and high current densities. Based on the calculated contribution ratios, it is easy to deduce that the diffusion coefficient highly affects the capacity contribution meaning that capacitive-controlled behavior takes the lead at fast scan rates and diffusion-controlled behavior at low scan rates. The electrochemical resistances are measured by the EIS technique in Fig. S5e for a better comparison of interfacial resistance, charge transfer, and ionic conductivity. The depressed semi-circle in the high electronic conductivity. To quantify the diffusion coefficient value of K cations, GITT was applied. Assuming the ionic conductive transfer of K<sup>+</sup> satisfies the Fick's second law, diffusion coefficients can be calculated based on the GITT results (Fig. S5f-i). The diffusion coefficient of K cations of the Fe<sub>3</sub>O<sub>4</sub>@LCS-500 electrode is around 1.06\*10<sup>-8</sup> cm<sup>2</sup> S<sup>-1</sup>, which is much higher than that of Fe<sub>3</sub>O<sub>4</sub>@LCS-400 (8.2\*10<sup>-9</sup> cm<sup>2</sup> S<sup>-1</sup>) and Fe<sub>3</sub>O<sub>4</sub>@LCS-600 (8.9\*10<sup>-9</sup> cm<sup>2</sup> S<sup>-1</sup>), implying fast diffusion coefficient in Fe<sub>3</sub>O<sub>4</sub>@LCS-500 electrode.



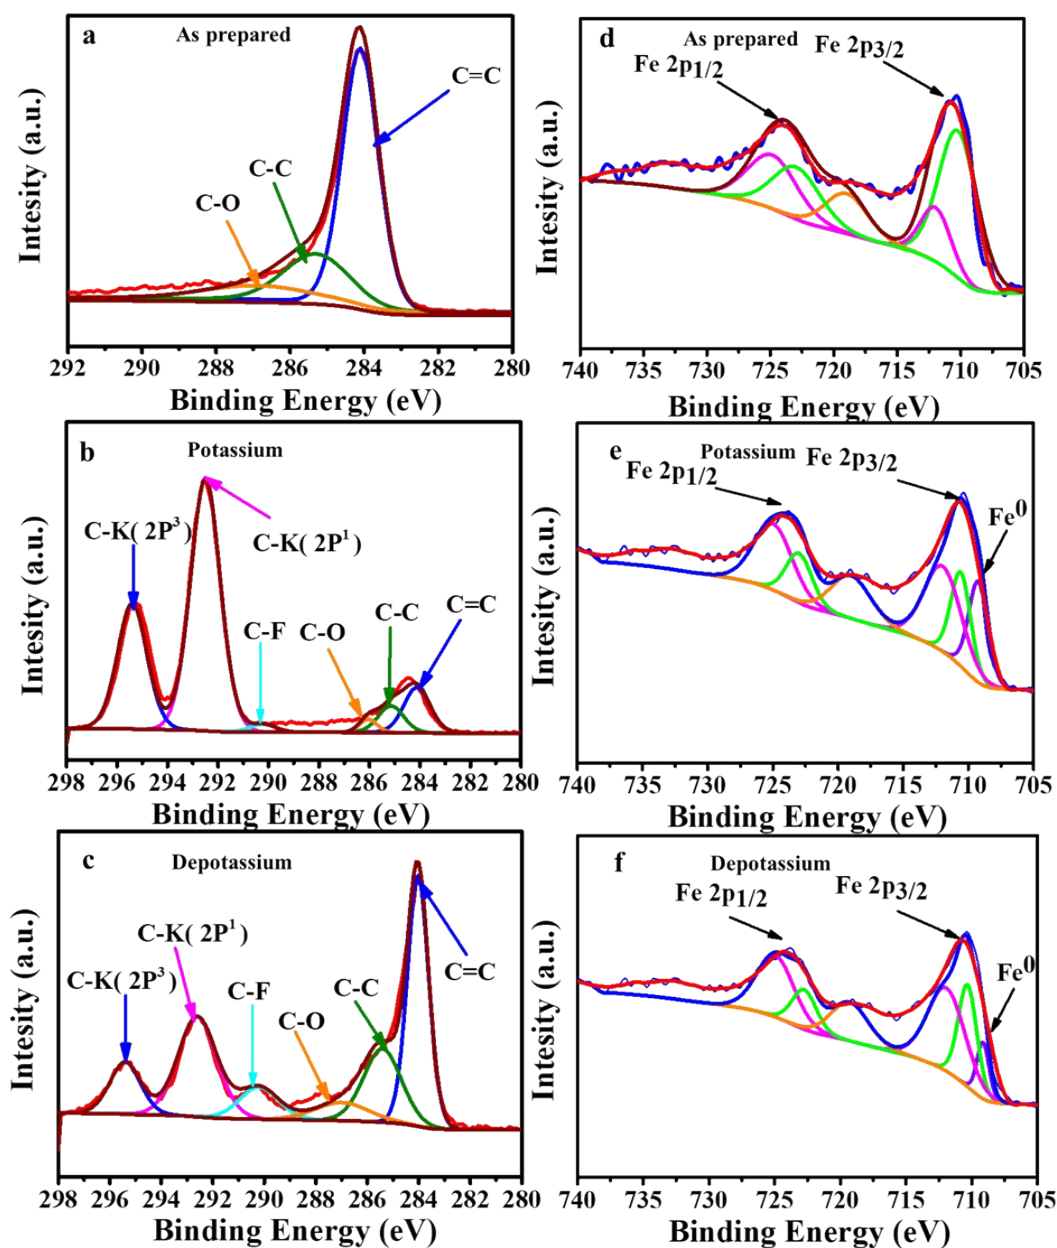

**Fig. S6.** *Ex-situ* XPS spectra of carbon and iron in the different valence states of  $\text{Fe}_3\text{O}_4@\text{LCS-500}$  electrodes in KIBs. (a) carbon spectrum; (b) carbon spectrum after fully potassiated; (c) carbon spectrum after fully depotassiated; (d) iron spectrum of the as-prepared  $\text{Fe}_3\text{O}_4@\text{LCS-500}$ ; (e) iron spectrum after fully potassiated; (f) iron spectrum after fully depotassiated.

To verify the redox reaction of  $\text{Fe}_3\text{O}_4@\text{LCS-500}$  as KIB anode, *ex-situ* XPS measurements were carried out. The main peak of the carbon spectrum of  $\text{Fe}_3\text{O}_4@\text{LCS-500}$  sample in Fig. S6a can be divided into three peaks of  $\sim 284.1$ ,  $285.6$ , and  $286.9$  eV, corresponding to C=C, C-C, and C-O, respectively. When it was fully potassiated, the peak intensity of carbon centered at  $284$  eV is turning weak and two new peaks emerged in Fig. S6b, relating to the C-K bonds centered at  $295$  eV ( $2\text{P}^3$ ) and  $292.5$  eV ( $2\text{P}^1$ ), respectively. A new peak at  $\sim 290.2$  eV is associated with the formation

of the C-F bond, which is ascribed to the decomposition of electrolyte and formation of the SEI layer. After fully depotassium process, the intensities of C-K bonds are getting weaker and those C-C bonds are returned to the original state in Fig. S6c, indicating the possibility of reversible potassium-storage by carbon. Meanwhile, the XPS spectra of  $\text{Fe}_3\text{O}_4$  in the  $\text{Fe}_3\text{O}_4@\text{LCS}$ -500 sample are displayed in Fig. S6d, which is divided into five major peaks, and similar to the analysis of LIBs. After the fully potassiated, a new peak of 709.102eV appeared in Fig. S6e, which is ascribed to the formation of metallic Fe. With the fully depotassiation (recharged) process in Fig. S6f, the intensity of Fe peak is obviously weakened, which is the solid evidence to prove the formation/disappearance of Fe, and indirectly demonstrated reversible conversion reactions of  $\text{Fe}_3\text{O}_4$  with potassium cations for KIBs.<sup>2</sup>

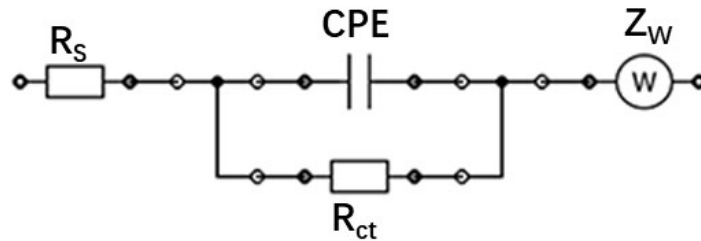

**Fig. S7** The equivalent circuit model of samples ( $\text{Fe}_3\text{O}_4@\text{LCS}$ -400/500/600)

**Table S2** The  $R_s$  and  $R_{ct}$  of ( $\text{Fe}_3\text{O}_4@\text{LCS}$ -400/500/600)

| Material                        | $\text{Fe}_3\text{O}_4@\text{LCS}$ -400<br>(LIBs/KIBs) | $\text{Fe}_3\text{O}_4@\text{LCS}$ -<br>500(LIBs/KIBs) | $\text{Fe}_3\text{O}_4@\text{LCS}$ -<br>600(LIBs/KIBs) |
|---------------------------------|--------------------------------------------------------|--------------------------------------------------------|--------------------------------------------------------|
| $R_s/ R_{ct}$ for<br>LIBs (ohm) | 15.33/171.9                                            | 15.85/9.727                                            | 2.707/15.52                                            |
| $R_s/ R_{ct}$ for<br>KIBs (ohm) | 8.221/7297                                             | 7.561/4497                                             | 15.98/4999                                             |

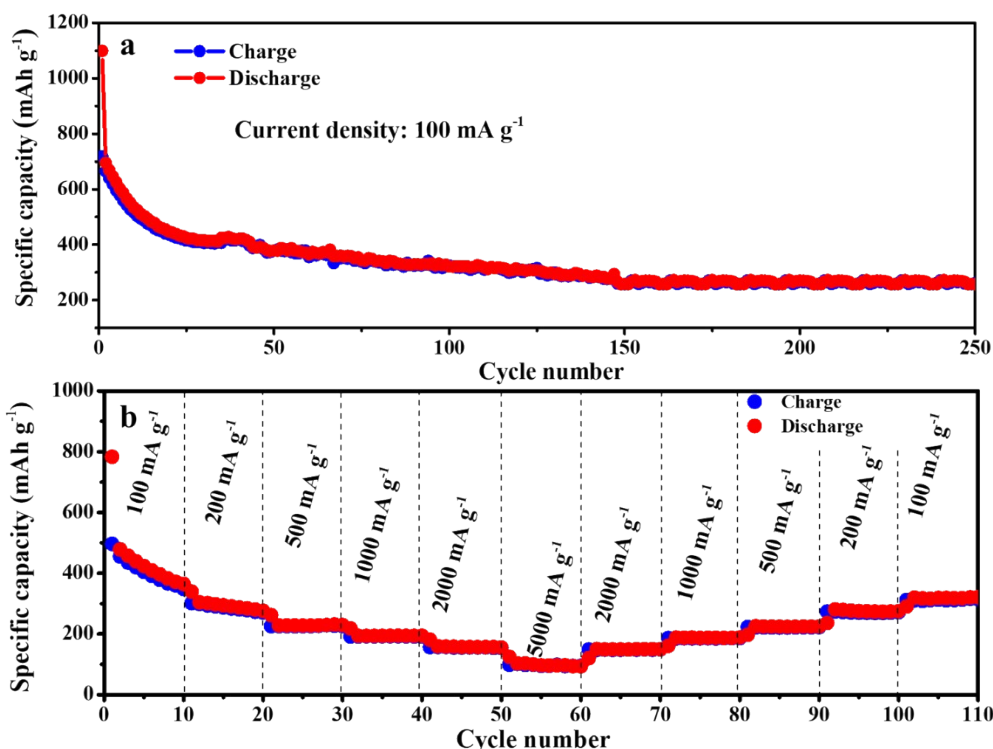

**Fig. S8** Lithium storage performances of Fe<sub>3</sub>O<sub>4</sub> bulk: (a) Cycle performances at 100 mA g<sup>-1</sup> for 250 cycles; (b) The rate performance at various current densities.

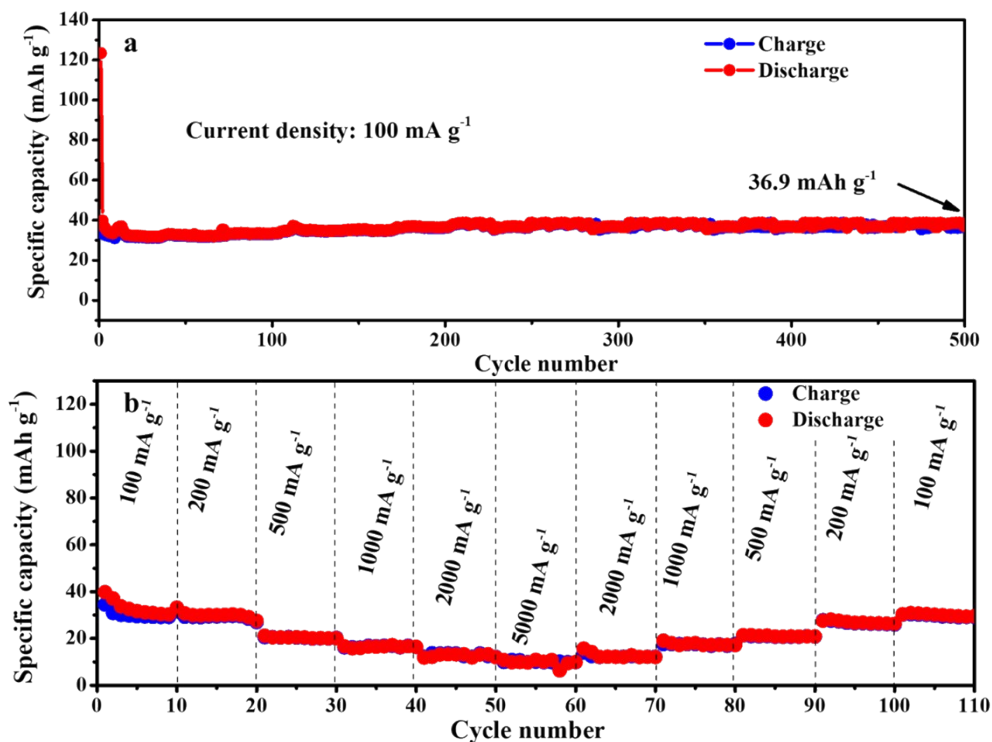

**Fig. S9** The electrochemical performances of Fe<sub>3</sub>O<sub>4</sub> bulk as anode of KIBs: (a) Cycle performances at 100 mA g<sup>-1</sup> for 500 cycles; (b) The rate performance at various current densities.



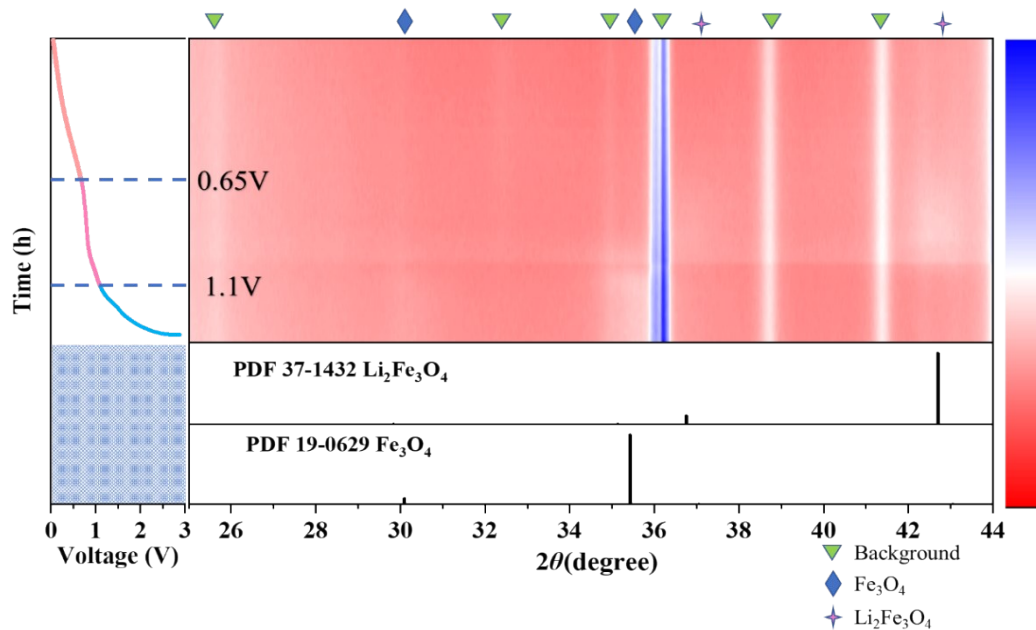

**Fig. S10** *In-situ* XRD of  $\text{Fe}_3\text{O}_4@\text{LCS-500}$  For LIBs in discharge process

A special *in-situ* XRD cell was assembled by directly coating the slurry on an ultra-thin Be foil to illustrate the generation of  $\text{Li}_2\text{Fe}_3\text{O}_4$  phase. The diffraction peaks of  $\text{Fe}_3\text{O}_4$  could be observed obviously at the initial state, and then gradually disappeared in Fig. S10. Diffraction peaks at  $36.75^\circ$  and  $42.7^\circ$ , corresponding to the (222) and (400) planes of  $\text{Li}_2\text{Fe}_3\text{O}_4$ , appeared when the voltage dropped to  $\sim 1.1$  V, and then disappeared in following discharge process, confirming  $\text{Li}_2\text{Fe}_3\text{O}_4$  was truly generated in the reduction process.

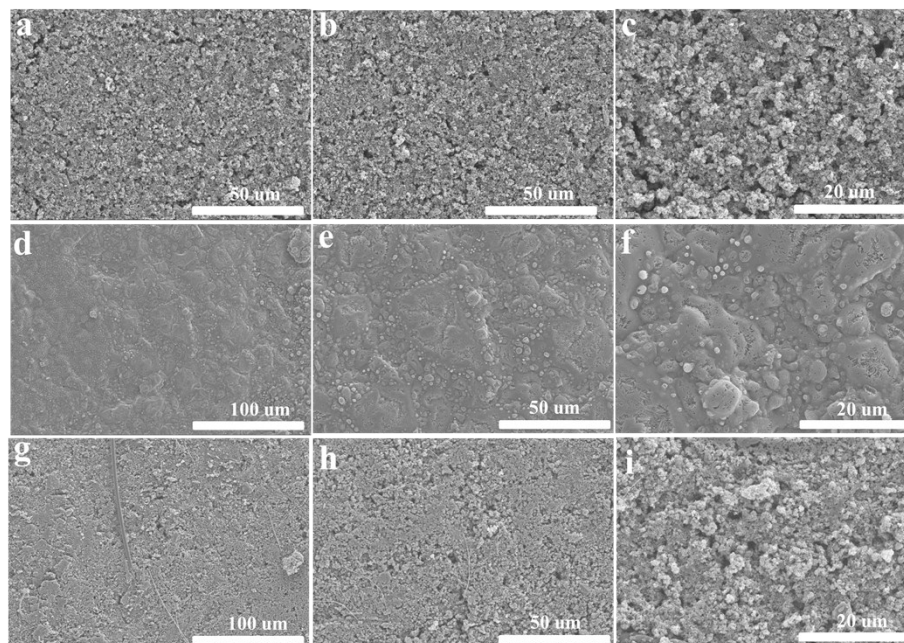

**Fig. S11** SEM images of electrodes: (a-c) as prepared  $\text{Fe}_3\text{O}_4@\text{LCS-500}$ ; (d-f) electrodes of  $\text{Fe}_3\text{O}_4@\text{LCS-500}$  after 200 cycles for LIBs; (g-i) electrodes of  $\text{Fe}_3\text{O}_4@\text{LCS-500}$  after 200 cycles for KIBs.

**Table S3** Electrochemical property comparison of the Fe<sub>3</sub>O<sub>4</sub>@LCS electrode with previous Fe<sub>3</sub>O<sub>4</sub>-related electrodes.

| Composite                                                                                              | Synthetic method                              | Morphology                        | S <sub>BET</sub> (m <sup>2</sup> g <sup>-1</sup> ) | V (cm <sup>3</sup> g <sup>-1</sup> ) | Current density (mA g <sup>-1</sup> ) | Cycle number | Capacity (mAh g <sup>-1</sup> ) | References |
|--------------------------------------------------------------------------------------------------------|-----------------------------------------------|-----------------------------------|----------------------------------------------------|--------------------------------------|---------------------------------------|--------------|---------------------------------|------------|
| <b>Fe<sub>3</sub>O<sub>4</sub> @ layered carbon nanosheets (Fe<sub>3</sub>O<sub>4</sub>@LCS)</b>       | Microwave-annealing                           | Nanosheet                         | 213.84                                             | 0.60                                 | 100(LIBs)                             | 250(LIBs)    | 1126(LIBs)                      | This work  |
|                                                                                                        |                                               |                                   |                                                    |                                      | 100(KIBs)                             | 500(KIBs)    | 429.7(KIBs)                     |            |
|                                                                                                        |                                               |                                   |                                                    |                                      | 500(KIBs)                             | 1000(KIBs)   | 286.8(KIBs)                     |            |
|                                                                                                        |                                               |                                   |                                                    |                                      | 1000(KIBs)                            | 1000(KIBs)   | 260(KIBs)                       |            |
|                                                                                                        |                                               |                                   |                                                    |                                      | 2000(KIBs)                            | 1000(KIBs)   | 141.1(KIBs)                     |            |
| <b>Fe<sub>3</sub>O<sub>4</sub>@nitrogen doped carbon nano capsule (Fe<sub>3</sub>O<sub>4</sub>@NC)</b> | Hydrothermal - coating-annealing              | Nanorod                           | 74.9                                               | /                                    | 500(LIBs)                             | 200(LIBs)    | 1028(LIBs)                      | 1          |
|                                                                                                        |                                               |                                   |                                                    |                                      | 5000(LIBs)                            | 500(LIBs)    | 873(LIBs)                       |            |
|                                                                                                        |                                               |                                   |                                                    |                                      | 10000(LIBs)                           | 500(LIBs)    | 612(LIBs)                       |            |
|                                                                                                        |                                               |                                   |                                                    |                                      | 20000(LIBs)                           | 1000(LIBs)   | 480(LIBs)                       |            |
| <b>Fe<sub>3</sub>O<sub>4</sub> dots@ carbon layer (Fe<sub>3</sub>O<sub>4</sub> dots@C layers)</b>      | Oil bath- room temperature stirring-annealing | Flower-like sheet                 | 78.1                                               | /                                    | 500(LIBs)                             | 550(LIBs)    | 1239.5(LIBs)                    | 2          |
|                                                                                                        |                                               |                                   |                                                    |                                      | 1000(LIBs)                            | 2000(LIBs)   | 938.7(LIBs)                     |            |
|                                                                                                        |                                               |                                   |                                                    |                                      | 2000(LIBs)                            | 2000(LIBs)   | 815.4(LIBs)                     |            |
| <b>graphene nanosheets/Fe<sub>3</sub>O<sub>4</sub> nanoparticles (GO-Fe<sub>3</sub>O<sub>4</sub>)</b>  | Langmuir-Schaefer (LS) technique              | Oriented layered hybrid structure | /                                                  | /                                    | 1000(LIBs)                            | 1000(LIBs)   | 411(LIBs)                       | 3          |
| <b>Fe<sub>3</sub>O<sub>4</sub>/N-graphene sponge</b>                                                   | Hydrothermal-freeze-dried-                    | Cross-linked thin graphene        | 154.9                                              | /                                    | 100(LIBs)                             | 200(LIBs)    | 699(LIBs)                       | 4          |

|                                                                                                                        | annealing                                            | nanosheets                                                        |       |   |                        |                        |                        |   |
|------------------------------------------------------------------------------------------------------------------------|------------------------------------------------------|-------------------------------------------------------------------|-------|---|------------------------|------------------------|------------------------|---|
| <b>Fe<sub>3</sub>O<sub>4</sub>@C nanospheres</b>                                                                       | One-step solvothermal method                         | Nanospheres                                                       | /     | / | 100(LIBs)              | 100(LIBs)              | 539(LIBs)              | 5 |
| <b>Mace-like carbon fibers@Fe<sub>3</sub>O<sub>4</sub>@carbon (CF@Fe<sub>3</sub>O<sub>4</sub>@C)</b>                   | <i>In-situ</i> growth-carbon coating-heat treatment  | Mace-like ordered structure                                       | 17.91 | / | 100(LIBs)<br>500(LIBs) | 100(LIBs)<br>500(LIBs) | 740(LIBs)<br>503(LIBs) | 6 |
| <b>N, P and S doped dual carbon-confined Fe<sub>3</sub>O<sub>4</sub> nanospheres (Fe<sub>3</sub>O<sub>4</sub>@C@G)</b> | Multi-heteroatom-doped dual carbon-confined strategy | Dual carbon-confined Fe <sub>3</sub> O <sub>4</sub> nanospheres   | 79.4  | / | 100(LIBs)<br>100(SIBs) | 130(LIBs)<br>600(SIBs) | 919(LIBs)<br>180(SIBs) | 7 |
| <b>N-doped carbon-riveted Fe<sub>3</sub>O<sub>4</sub> /N-doped carbon (N-C@Fe<sub>3</sub>O<sub>4</sub>@N-C)</b>        | Rational N-doped carbon riveting strategy            | Fe <sub>3</sub> O <sub>4</sub> /N-doped carbon tubular structures | 28.41 | / | 100(LIBs)              | 100(LIBs)              | 675.8(LIBs)            | 8 |
| <b>Fe<sub>3</sub>O<sub>4</sub>/C nanocomposites</b>                                                                    | Nanoparticles on nanofiber aerogels                  | Centrifugal spinning                                              | /     | / | 100(LIBs)              | 100(LIBs)              | 505(LIBs)              | 9 |

|                                                                                                                                    |                                                   |                          |        |     |                         |                         |                        |    |
|------------------------------------------------------------------------------------------------------------------------------------|---------------------------------------------------|--------------------------|--------|-----|-------------------------|-------------------------|------------------------|----|
| <b>Fe<sub>3</sub>O<sub>4</sub>/reduced graphene oxide nanocomposites (Fe<sub>3</sub>O<sub>4</sub>/rGO)</b>                         | Nanoparticles/sheets                              | Gamma-irradiation method | /      | /   | 500(LIBs)               | 100(LIBs)               | 738.5(LIBs)            | 10 |
| <b>1D sandwich-like C@Fe<sub>3</sub>O<sub>4</sub>@C coaxial nanotubes</b>                                                          | 1D sandwich-like                                  | Bottom-up method         | /      | /   | 100(LIBs)               | 150(LIBs)               | 1087(LIBs)             | 11 |
| <b>Fe<sub>3</sub>O<sub>4</sub>@C-N yolk-shell nano capsules</b>                                                                    | Hydrothermal method/calci-nation                  | Yolk shell structure     | /      | /   | 500(LIBs)               | 150(LIBs)               | 832(LIBs)              | 12 |
| <b>Carbon coated Fe<sub>3</sub>O<sub>4</sub> QDs imbedded on reduced graphene oxide (Fe<sub>3</sub>O<sub>4</sub> QDs@C/rGO)</b>    | Water bath-Hydrothermal-annealing                 | Layered structure        | 290.43 | 0.4 | 500(LIBs)<br>2000(LIBs) | 300(LIBs)<br>2000(LIBs) | 737(LIBs)<br>505(LIBs) | 13 |
| <b>Fe<sub>3</sub>O<sub>4</sub> quantum dots/graphene aerogel materials (Fe<sub>3</sub>O<sub>4</sub> QDs/GA)</b>                    | Hydrothermal-heat treatment process               | Network structure        | /      | /   | 100(LIBs)               | 70(LIBs)                | 1078(LIBs)             | 14 |
| <b>Fe<sub>3</sub>O<sub>4</sub> quantum dots (QDs) grown on graphite paper (Fe<sub>3</sub>O<sub>4</sub> QDs@MoS<sub>2</sub>-GP)</b> | Hydrothermal-low-temperature hydrolysis-annealing | Nanosheet                |        |     | 100(SIBs)               | 300(SIBs)               | 388(SIBs)              | 15 |

**Table S4** The XPS results of Fe<sub>3</sub>O<sub>4</sub>

| <b>Samples</b>                                                                                   | <b>XPS results of Fe</b>                                                                                                                                                                                                                                          | <b>References</b> |
|--------------------------------------------------------------------------------------------------|-------------------------------------------------------------------------------------------------------------------------------------------------------------------------------------------------------------------------------------------------------------------|-------------------|
| <b>Fe<sub>3</sub>O<sub>4</sub> @ layered carbon nanosheets (Fe<sub>3</sub>O<sub>4</sub>@LCS)</b> | Fe 2p <sub>3/2</sub> (Fe <sup>3+</sup> /711.91, Fe <sup>2+</sup> /710.2 eV)<br>Fe 2p <sub>1/2</sub> (Fe <sup>3+</sup> /724.9 eV, Fe <sup>2+</sup> /722.2 eV)<br>A satellite peak (719.11 eV)                                                                      | <b>This work</b>  |
| <b>Flower-like Fe<sub>3</sub>O<sub>4</sub>/C</b>                                                 | Fe 2p <sub>3/2</sub> (Fe <sup>3+</sup> /709.8 eV, Fe <sup>2+</sup> /711.3 eV)<br>Fe 2p <sub>1/2</sub> (Fe <sup>3+</sup> /723.5 eV, Fe <sup>2+</sup> /724.8 eV)                                                                                                    | 18                |
| <b>CF@Fe<sub>3</sub>O<sub>4</sub>@C</b>                                                          | Fe 2p <sub>3/2</sub> (711.1 eV, 720.1 eV)<br>Fe 2p <sub>1/2</sub> (725.0 eV, 733.7 eV)                                                                                                                                                                            | 6                 |
| <b>N-C@Fe<sub>3</sub>O<sub>4</sub> @N-C</b>                                                      | Fe 2p <sub>3/2</sub> (Fe <sup>2+</sup> /710.9 eV)<br>Fe 2p <sub>1/2</sub> (Fe <sup>3+</sup> /724.6 eV)                                                                                                                                                            | 8                 |
| <b>Fe<sub>3</sub>O<sub>4</sub>/C composite nanofibers</b>                                        | Fe 2p <sub>1/2</sub> (723.8 eV, 733.2 eV)<br>Fe 2p <sub>3/2</sub> (711.6 eV, 717.6 eV)                                                                                                                                                                            | 9                 |
| <b>Fe<sub>3</sub>O<sub>4</sub>/rGO</b>                                                           | Fe 2p <sub>3/2</sub> (Fe <sup>3+</sup> /712.3 eV, Fe <sup>2+</sup> /710.2 eV)<br>Fe 2p <sub>1/2</sub> (Fe <sup>3+</sup> /725.5 eV, Fe <sup>2+</sup> / 723.7 eV)<br>The presence of Fe (III) symbiosis with Fe <sub>3</sub> O <sub>4</sub> (718.3 eV and 732.4 eV) | 10                |
| <b>Fe<sub>3</sub>O<sub>4</sub>@NC networks</b>                                                   | Fe2p <sub>3/2</sub> (710.8 eV)<br>Fe2p <sub>1/2</sub> (724.6 eV)<br>a weak satellite peak (721.3 eV)                                                                                                                                                              | 19                |
| <b>Fe<sub>3</sub>O<sub>4</sub> QDs @C/rGO</b>                                                    | Fe 2p <sub>3/2</sub> (Fe <sup>3+</sup> /710.0 eV, Fe <sup>2+</sup> /711.8.3 eV)<br>Fe 2p <sub>1/2</sub> ((Fe <sup>3+</sup> /723.7 eV, Fe <sup>2+</sup> /725.8 eV)                                                                                                 | 13                |
| <b>Fe<sub>3</sub>O<sub>4</sub> array</b>                                                         | 2p <sub>1/2</sub> (724.2 eV)<br>Fe 2p <sub>3/2</sub> (Fe <sup>3+</sup> /711.7 eV, Fe <sup>2+</sup> / 709.9 eV)<br>The fingerprint of γ-Fe <sub>2</sub> O <sub>3</sub> (719 eV)                                                                                    | 20                |
| <b>Fe<sub>3</sub>O<sub>4</sub>/N-GAs</b>                                                         | Fe 2p <sub>3/2</sub> (711 eV)<br>Fe2p <sub>1/2</sub> (725 eV),                                                                                                                                                                                                    | 21                |
| <b>Sandwich-like C/Fe<sub>3</sub>O<sub>4</sub>/rGO</b>                                           | Fe 2p <sub>3/2</sub> (Fe <sup>3+</sup> /711.7, Fe <sup>2+</sup> / 710.3 eV, 710.6 eV)<br>Fe 2p <sub>1/2</sub> (Fe <sup>3+</sup> /725.1 eV, Fe <sup>2+</sup> /723.6 eV, 724.5 eV)                                                                                  | 22                |

## Reference

1. L. Wan, D. Yan, X. Xu, J. Li, T. Lu, Y. Gao, Y. Yao and L. Pan, *J. Mater. Chem. A*, 2018, **6**, 24940-24948.
2. Q. Li, H. Li, Q. Xia, Z. Hu, Y. Zhu, S. Yan, C. Ge, Q. Zhang, X. Wang, X. Shang, S. Fan, Y. Long, L. Gu, G. X. Miao, G. Yu and J. S. Moodera, *Nat. Mater*, 2020, DOI: 10.1038/s41563-020-0756-y.
3. H. Duan, S. Zhang, Z. Chen, A. Xu, S. Zhan and S. Wu, *ACS Applied Materials & Interfaces*, 2020, **12**, 527-537.
4. Z. Shi, Q. Zhang, L. Zhao, H. Wang and W. Zhou, *ACS Applied Materials & Interfaces*, 2020, **12**, 15043-15052.
5. H.-S. Jeong, H. Kim, K.-I. Jo, J. Jang, J.-H. Choi and J. Koo, *Applied Surface Science*, 2020, **508**, 144416.
6. J. He, A. Bhargava and A. Manthiram, *Energy Storage Materials*, 2019, **23**, 88-94.
7. H. Lv, *International Journal of Electrochemical Science*, 2020, DOI: 10.20964/2020.03.21, 2157-2165.
8. S. Yao, G. Zhang, X. Zhang and Z. Shi, *Ionics*, 2020, DOI: 10.1007/s11581-020-03748-6.
9. X. Tao, Y. Li, H.-G. Wang, X. Lv, Y. Li, D. Xu, Y. Jiang and Y. Meng, *Journal of Colloid and Interface Science*, 2020, **565**, 494-502.
10. T. Ma, X. Liu, L. Sun, Y. Xu, L. Zheng and J. Zhang, *Journal of Energy Chemistry*, 2019, **34**, 43-51.
11. M. Akia, N. Salinas, S. Luna, E. Medina, A. Valdez, J. Lopez, J. Ayala, M. Alcoutlabi and K. Lozano, *Journal of Materials Science*, 2019, **54**, 13479-13490.
12. Y. Liang and W. Lu, *Journal of Materials Science: Materials in Electronics*, 2020, DOI: 10.1007/s10854-020-04268-9.
13. Q. Qu, J. Chen, X. Li, T. Gao, J. Shao and H. Zheng, 2015, **3**, 18289-18295.
14. Q. Wu, R. Zhao, W. Liu, X. Zhang, X. Shen, W. Li, G. Diao and M. Chen, 2017, **344**, 74-84.
15. C. Wang, S. Mutahir, L. Wang, W. Lei, X. Xia, X. Jiao and Q. Hao, *Applied Surface Science*, 2020, **509**, 144882.
16. Y. Wang, Y. Jin, Y. Duan and M. Jia, *Ionics*, 2017, **23**, 2005-2011.
17. D. Kong, C. Cheng, Y. Wang, Z. Huang, B. Liu, Y. Von Lim, Q. Ge and H. Y. Yang, *Journal of Materials Chemistry A*, 2017, **5**, 9122-9131.
18. L. Wan, D. Yan, X. Xu, J. Li, T. Lu, Y. Gao, Y. Yao and L. Pan, *Journal of Materials Chemistry A*, 2018, **6**, 24940-24948.
19. C. Mao, X. Xu, S. Wang, J. Liu, X. Guo, H. Peng, Z. Zhang and G. Li, *Applied Surface Science*, 2020, **505**, 144525.
20. G. Zhong, K. Qu, C. Ren, Y. Su, B. Fu, M. Zi, L. Dai, Q. Xiao, J. Xu, X. Zhong, F. An, M. Ye, S. Ke, S. Xie, J. Wang, P. Gao and J. Li, *Nano Energy*, 2020, **74**, 104876.
21. Z.-S. Wu, S. Yang, Y. Sun, K. Parvez, X. Feng and K. Müllen, *Journal of the American Chemical Society*, 2012, **134**, 9082-9085.
22. Q. Wu, R. Jiang and H. Liu, *Ceramics International*, 2020, **46**, 12732-12739.
